# Supplementary material for: TGF-β sensitivity is determined by N-linked glycosylation of the type II TGF-β receptor
Source: PubMed Central journal article supplement — Biochem J. 2012 Jul 13;445(Pt 3):403–11. doi: 10.1042/BJ20111923 (PMC3462611; doi:10.1042/bj20111923), 2012-07-13
Supplement: bj4450403add.pdf [file bj4450403add.pdf]

SUPPLEMENTARY ONLINE DATA

TGF-β sensitivity is determined by N-linked glycosylation of the type II TGF-β receptor

Young-Woong KIM\*<sup>†1,2</sup>, Jinah PARK\*<sup>†1</sup>, Hyun-Ju LEE\*<sup>†</sup>, So-Young LEE\*<sup>§</sup> and Seong-Jin KIM\*<sup>†‡3</sup>

\*CHA Cancer Research Institute, CHA University, Seoul, 135-081, South Korea, †Laboratory of Cell Regulation and Carcinogenesis, Lee Gil Ya Cancer and Diabetes Institute, Gachon University of Medicine and Science, Incheon, 406-840, South Korea, ‡Department of Pediatrics, Case Western Reserve University, Cleveland, OH 44195, U.S.A., and §Department of Internal Medicine, Bundang CHA General Hospital, College of Medicine, CHA University, Seongnam, 463-712, South Korea

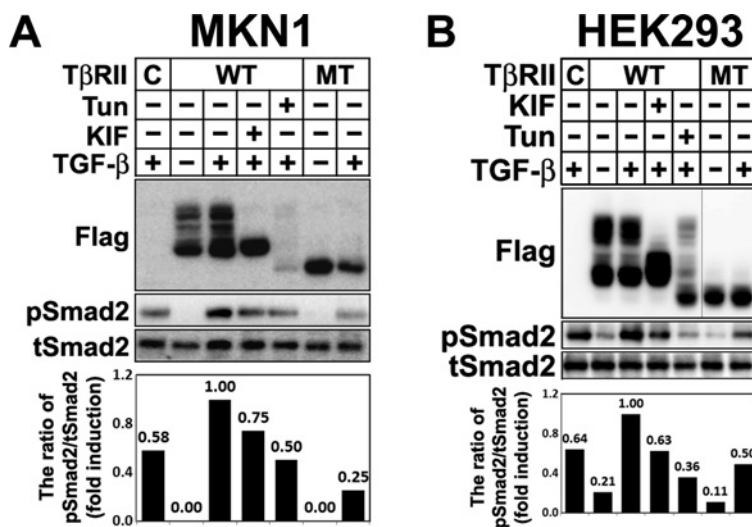

Figure S1 N-linked glycosylation levels of TβRII regulate TGF-β signaling in MKN1 and HEK-293 cell lines

C-terminally FLAG-tagged mTβRII-B was transfected into MKN1 (A) and HEK-293 (B) cells. Cells were treated with KIF and Tun at 10 μg/ml for 24 h and 1 μg/ml for 12 h respectively. At 28 h after transfection, cells were treated with or without TGF-β1 at 5 ng/ml for 30 min. Cell extracts were immunoblotted with anti-FLAG (TβRII), anti-phospho-Smad2 or anti-Smad2 antibody. Band intensities representing phospho-Smad2 and Smad2 expression levels were converted by densitometry using ImageJ software into the ratio of phospho-Smad2 to Smad2. Note that KIF and Tun treatment reduced or inhibited the N-linked glycosylation level of TβRII. In addition, Smad2 phosphorylation was subsequently reduced upon KIF and Tun treatment.

Received 15 November 2011/8 May 2012; accepted 10 May 2012  
 Published as BJ Immediate Publication 10 May 2012, doi:10.1042/BJ20111923

<sup>1</sup> These authors contributed equally to this work.  
<sup>2</sup> Present address: Department of Molecular Cardiology, Taussig Cancer Center, Lerner Research Institute, Cleveland Clinic, Cleveland, OH 44195, U.S.A.  
<sup>3</sup> To whom correspondence should be addressed (email kimsj@cha.ac.kr).
